# Supplementary material
Source: PubMed Central journal article supplement (PMC4005386)
Supplement: NIHMS572909-supplement-Tables.pdf [file NIHMS572909-supplement-Tables.pdf]

## Supplementary Tables

Supplementary Table 1. Enriched signaling pathways for the differentially expressed genes in brain, lung and bone metastasis.

| Tropism                 | Ingenuity Canonical Pathways            | -log(p-value) | Ratio    | Molecules                                                                                                                                                                                                                                                                                                                      |
|-------------------------|-----------------------------------------|---------------|----------|--------------------------------------------------------------------------------------------------------------------------------------------------------------------------------------------------------------------------------------------------------------------------------------------------------------------------------|
| <b>Brain metastasis</b> | NF-κB Signaling                         | 4.57          | 1.20E-01 | RAC2,TLR10,TRAF3,IL36G,PRKCQ,MAPK8,TGFA,PIK3R5,TNFRSF1B,TNFSF13B,EGFR,PRKCB                                                                                                                                                                                                                                                    |
|                         | T Cell Receptor Signaling               | 4.56          | 1.43E-01 | FYN,PTPN7,PRKCQ,CD3E,PAG1,MAPK8,PIK3R5,VAV1,CD8A,LCP2                                                                                                                                                                                                                                                                          |
|                         | Natural Killer Cell Signaling           | 4.45          | 1.55E-01 | FYN,RAC2,PRKCQ,KLRD1,PIK3R5,VAV1,HCST,LCP2,PRKCB                                                                                                                                                                                                                                                                               |
|                         | Cdc42 Signaling                         | 3.54          | 1.09E-01 | WIPF1,MAPK14,null,CD3E,HLA-E,WAS,MAPK8,VAV1,HLA-F,null                                                                                                                                                                                                                                                                         |
|                         | HER-2 Signaling in Breast Cancer        | 1.94          | 9.09E-02 | RAC2,PRKCQ,FOXO1,PIK3R5,EGFR,PRKCB                                                                                                                                                                                                                                                                                             |
|                         | CD40 Signaling                          | 1.82          | 9.80E-02 | TRAF3,MAPK14,MAPK8,PIK3R5,JAK3                                                                                                                                                                                                                                                                                                 |
|                         | mTOR Signaling                          | 1.74          | 6.90E-02 | RAC2,PRKCQ,PPP2R4,RHOT2,PIK3R5,PLD1,EIF4B,PRKCB                                                                                                                                                                                                                                                                                |
| <b>Lung metastasis</b>  | PI3K Signaling in B Lymphocytes         | 1.61          | 7.00E-02 | CD81,FYN,RAC2,LYN,VAV1,IL4 (includes EG:16189),PRKCB                                                                                                                                                                                                                                                                           |
|                         | Cdc42 Signaling                         | 2.21          | 1.61E-01 | VAV2,ACTR2,MYL6,MAPK9,LIMK2,FGD1,PARD6A,CLIP1,PRKCZ,ATF2,DIAPH1,PRKCI,MAPK14,WASL,PAK3,HLA-E,ARPC2,ARHGEF6,HLA-DRA,HLA-B,PPP1R12A,HLA-F,null                                                                                                                                                                                   |
|                         | LPS-stimulated MAPK Signaling           | 2.09          | 2.03E-01 | RAC1,HRAS,MAPK9,IKBKE,NFKB2,PRKCZ,ATF2,PRKCI,MAPK14,MAP3K7 (includes EG:26409), PIK3CG,CREB1, MRAS, MAP2K3, PRKCH, PRKD3                                                                                                                                                                                                       |
|                         | SAPK/JNK Signaling                      | 1.96          | 1.80E-01 | SH2D2A,MAP2K7,NFATC3,MAP3K13,RAC1,HRAS,MAPK9,CRK,MAPK8IP1,HNRNPK,GNG7,ATF2,SHC1 (includes EG:20416), LCK,GAB1,MAP3K7 (includes EG:26409), PIK3CG,MRAS                                                                                                                                                                          |
|                         | CD27 Signaling in Lymphocytes           | 1.95          | 2.18E-01 | BCL2L1,MAP2K7,SIVA1,MAP3K7 (includes EG:26409), MAP3K13,MAPK9,IKBKE,IKBKAP,MAP2K3,NFKB2,CD27,MAP2K5                                                                                                                                                                                                                            |
|                         | ATM Signaling                           | 1.82          | 2.03E-01 | SMC3,GADD45B,MAPK14,H2AFX,CREB1,MAPK9,MDM2,TP53BP1,TLK2,CDK1,RAD50,ATF2                                                                                                                                                                                                                                                        |
|                         | Calcium-induced T Lymphocyte Apoptosis  | 1.72          | 1.15E-01 | TRD@,ITPR3,NR4A1,PRKCE,PLCG1,ATP2A2,PPP3CA                                                                                                                                                                                                                                                                                     |
| <b>Bone metastasis</b>  | B Cell Activating Factor Signaling      | 1.62          | 2.05E-01 | TRAF6,MAP2K7,MAPK14,NFATC3,MAPK9,IKBKE,IKBKAP,NFATC4,NFKB2                                                                                                                                                                                                                                                                     |
|                         | HER-2 Signaling in Breast Cancer        | 1.38          | 1.77E-01 | TSC1,CCNE2,HRAS,MDM2,ITGB8,PARD6A,ITGB7,PRKCZ,PRKCI,PIK3CG,MRAS,PRKCH,PRKD3,ITGB5                                                                                                                                                                                                                                              |
|                         | EIF2 Signaling                          | 23.5          | 2.64E-01 | RPL24,EIF2S3,RPL22,RPL27A,MAPK1,null,null,RPS8,RPS6,RPL14,RPL26,RPS23,RPL37A,RPS11,RPL10A,RPS7,SHC1 (includes EG:20416),RPL6,RPS3A,null,PIK3C3,RPS9,SOS1,RPL35,RPLP2,EIF3A,RPL3,RPL17,null,null,RPS19,RPL23A,RPL9,RPLP0,null,RPL15,RPS4X,null,RPL5,null,RPS15,EIF2B1,null,RPS15A,RPL38 (includes EG:3355144),EIF3L,RPL13A,RPSA |
|                         | Regulation of eIF4 and p70S6K Signaling | 6.62          | 1.45E-01 | EIF2S3,MAPK1,null,RPS19,RPS6,RPS8,MAPK11,RPS23,RPS11,RPS7,SHC1 (includes EG:20416), RPS4X, RPS3A, null, PIK3C3, SOS1,RPS9,EIF2B1,RPS15,EIF3A,RPS15A,EIF3L,RPSA                                                                                                                                                                 |
|                         | Breast Cancer Regulation by Stathmin1   | 3.98          | 1.11E-01 | ARHGEF12,MAPK1,null,TUBA4A,TUBB,TUBA1B,CDK1,GNG7,SHC1 (includes EG:20416), GNG11, PIK3C3, CDKN1A, ITPR3, SOS1,PRKCE,TUBA1C,ARHGEF3,ARHGEF9,OPN1SW,CDK2,CAMK2B,CAMK2G                                                                                                                                                           |
|                         | mTOR Signaling                          | 3.84          | 1.11E-01 | MAPK1,DDIT4,null,RPS19,RPS6,RPS8,RPS23,RPS11,RPS7,RPS4X,RPS6KA6,RPS3A,null,PIK3C3,RPS9,RPS15,EIF3A,PRKCE,RPS15A,EIF3L,RPSA                                                                                                                                                                                                     |
|                         | HGF Signaling                           | 3.65          | 1.37E-01 | CDKN2A,MAP3K9,null,MAPK1,PLCG1,ETS2,IL6,ELF4,PIK3C3,CDKN1A,SOS1,PRKCE,MAP3K8,CDK2                                                                                                                                                                                                                                              |
| <b>Bone metastasis</b>  | VEGF Signaling                          | 2.66          | 1.21E-01 | EIF2S3,SHC1 (includes EG:20416), MAPK1, PIK3C3, SOS1, EIF2B1,PLCG1,VCL,SFN,ACTG1,ACTN1                                                                                                                                                                                                                                         |
|                         | GM-CSF Signaling                        | 2.62          | 1.36E-01 | SHC1 (includes EG:20416),MAPK1,PIM1 (includes EG:18712),PIK3C3,SOS1,CSF2,PPP3CA,CAMK2B,CAMK2G                                                                                                                                                                                                                                  |
|                         | Gap Junction Signaling                  | 2.5           | 9.88E-02 | MAPK1,TUBA4A,PLCG1,TUBB,ACTG1,TUBA1B,PIK3C3,ITPR3,SOS1,PRKCE,TUBA1C,MAPK7,NPR2,OPN1SW,PPP3CA,HTR2A                                                                                                                                                                                                                             |
|                         | Estrogen-mediated S-phase Entry         | 2.33          | 1.85E-01 | TFDP1,CDKN1A,ESR2,CDK1,CDK2                                                                                                                                                                                                                                                                                                    |
|                         | EGF Signaling                           | 2.26          | 1.46E-01 | SHC1 (includes EG:20416), MAPK1, PIK3C3, SOS1, ITPR3, SRF, PLCG1                                                                                                                                                                                                                                                               |

|                                        |          |          |                                                                                     |
|----------------------------------------|----------|----------|-------------------------------------------------------------------------------------|
| GNRH Signaling                         | 2.23     | 9.85E-02 | MAP3K9,null,MAPK1,MAPK11,DNM1,SOS1,ITPR3,PRKCE,MAP3K8,MAPK7,OPN1SW,CAMK2B,CAMK2G    |
| JAK/Stat Signaling                     | 1.87     | 1.14E-01 | SHC1 (includes EG:20416), MAPK1, PIK3C3, CDKN1A, SOS1, STAT2,IL6,CCKBR              |
| Growth Hormone Signaling               | 1.83     | 1.13E-01 | RPS6KA6,MAPK1,PIK3C3,IGF1R,SRF,IGFBP3,PRKCE,PLCG1                                   |
| PDGF Signaling                         | 1.73     | 1.10E-01 | SHC1 (includes EG:20416), MAPK1, PIK3C3, SOS1, SRF, PLCG1, INPPL1,PDGFB             |
| Calcium-induced T Lymphocyte Apoptosis | 1.72     | 1.15E-01 | TRD@,ITPR3,NR4A1,PRKCE,PLCG1,ATP2A2,PPP3CA                                          |
| Cell Cycle: G1/S Checkpoint Regulation | 1.68     | 1.09E-01 | CDKN2A,HDAC6,RPL5,TFDP1,CDKN1A,GNL3,CDK2                                            |
| SAPK/JNK Signaling                     | 1.5      | 9.00E-02 | MINK1,SHC1 (includes EG:20416), MAP3K9, GNG11, TRD, null, PIK3C3,SOS1,GNG7          |
| PTEN Signaling                         | 1.43     | 8.06E-02 | FGFR3,SHC1 (includes EG:20416), null, MAPK1, CDKN1A, SOS1, IGF1R,FGFR2,INPPL1,IGF2R |
| Telomerase Signaling                   | 1.42     | 9.09E-02 | HDAC6,TERF2,SHC1 (includes EG:20416), ELF4, MAPK1, PIK3C3,CDKN1A,SOS1,ETS2          |
| Erythropoietin Signaling               | 1.41E+00 | 9.46E-02 | SHC1 (includes EG:20416), NFKBIA, MAPK1, PIK3C3, SOS1, PRKCE,PLCG1                  |
| AMPK Signaling                         | 1.35     | 7.86E-02 | GYS1,MAPK1,SMARCA2,PIK3C3,STRADA,LIPE,AK4,CHRNE,PFKL,MAPK11,ADRA1D                  |

Supplementary Table 2. Repositioned drug candidates for lung metastasis of breast cancer.

| Tropism         | Repositioned targets | Repositioned drugs       | Clinical information    | Indications                                                                                                                          |
|-----------------|----------------------|--------------------------|-------------------------|--------------------------------------------------------------------------------------------------------------------------------------|
| Lung metastasis | RAC1                 | Pravastatin              | Approved                | Cardiovascular Disease<br>Hyperlipidemia                                                                                             |
|                 | RAF1                 | Sorafenib                | Approved                | Hepatocellular Carcinoma<br>Renal Cell Carcinoma                                                                                     |
|                 | RAC1                 | Simvastatin              | Approved                | CHD Mortality and Cardiovascular Events<br>Hyperlipidemia Adolescent Patients with Heterozygous Familial Hypercholesterolemia (HeFH) |
|                 | CDC25B               | Double Oxidized Cysteine | No clinical information |                                                                                                                                      |
|                 | CDC25B               | Beta-Mercaptoethanol     | No clinical information |                                                                                                                                      |
|                 | CDC25B               | Cysteine Sulfenic Acid   | No clinical information |                                                                                                                                      |
|                 | CDC25B               | Cysteinesulfonic Acid    | No clinical information |                                                                                                                                      |
|                 | CDC25B               | Methyl Mercury Ion       | No clinical information |                                                                                                                                      |
|                 | RAC1 CDC42           | Guanosine-5'-Diphosphate | No clinical information |                                                                                                                                      |
| Bone metastasis | IKBKB                | Auranofin                | Approved                | rheumatoid arthritis                                                                                                                 |
|                 | CDC42                | Guanosine-5'-Diphosphate | No clinical information |                                                                                                                                      |

Supplementary Table 3. Expression of p-RET and p-FYN in brain metastases tissues of breast cancer patient.

| <b>H score</b> | <b>Negative (0-9)</b> | <b>Low (10-100)</b> | <b>Medium (101-200)</b> | <b>High (201-300)</b> |
|----------------|-----------------------|---------------------|-------------------------|-----------------------|
| <b>p-FYN</b>   | 4 (14%)               | 12 (41%)            | 6 (21%)                 | 7 (24%)               |
| <b>p-RET</b>   | 6 (21%)               | 14 (48%)            | 5 (17%)                 | 4 (14%)               |
